# Supplementary material
Source: PubMed Central journal article supplement (PMC8553103)
Supplement: 103_2021_3446_MOESM1_ESM.pdf [file 103_2021_3446_MOESM1_ESM.pdf]

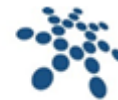

**Liebe Eltern,**

um herauszufinden, wie groß die Belastung durch die Coronakrise und den Lock-down für Familien und deren Kinder in der Region Hannover war, führen wir eine Befragung im Rahmen der Schuleingangsuntersuchung durch. Hierzu möchten wir Sie bitten die folgenden Fragen zu beantworten. Im Anschluss können Sie den Zettel in die bereitgestellte Box einwerfen oder einer unserer Mitarbeiterinnen geben.

Die Auswertung wird vollkommen anonym stattfinden und es wird keinen Bezug zu Ihnen oder Ihrem Kind geben.

**Vielen Dank für Ihre Mitarbeit!**

|                                                                                                                           |               |         |      |
|---------------------------------------------------------------------------------------------------------------------------|---------------|---------|------|
| In unserem Haushalt leben Kinder im Alter von                                                                             | 0-3 Jahren    | ja      | nein |
|                                                                                                                           | 4-6 Jahren    | ja      | nein |
|                                                                                                                           | 7-10 Jahren   | ja      | nein |
|                                                                                                                           | 11- 16 Jahren | ja      | nein |
| Wir wohnen in einer Wohnung/ einem Haus mit der Möglichkeit einer Gartennutzung.                                          |               | ja      | nein |
| In unserer Wohnung/ unserem Haus hatten wir die Möglichkeit uns zurückzuziehen und aus dem Weg zu gehen.                  |               | ja      | nein |
| Wir hatten die Möglichkeit einer Notbetreuung für unser Kind/unsere Kinder                                                |               | ja      | nein |
| ..... die Möglichkeit einer anderen Betreuung (Großeltern oder Freunde).                                                  |               | ja      | nein |
| Während der Coronakrise hatten wir häufiger Streitigkeiten in der Familie als vor der Krise.                              |               | ja      | nein |
| Unser Kind/ unsere Kinder waren häufiger traurig als vor der Krise.                                                       |               | ja      | nein |
| ..... hatte/n häufiger Wutanfälle als vor der Krise.                                                                      |               | ja      | nein |
| ..... war/en ruhiger und zurückgezogener als vor der Krise.                                                               |               | ja      | nein |
| ..... zeigte/n mehr Ängste und Sorgen.                                                                                    |               | ja      | nein |
| ..... klagte/n vermehrt über Bauchschmerzen, Kopfschmerzen, Übelkeit oder Appetitlosigkeit.                               |               | ja      | nein |
| Bei unserem Kind/ unseren Kindern sind andere Auffälligkeiten (z.B. Stottern oder Einnässen) neu oder wieder aufgetreten. |               | ja      | nein |
| Unser Kind/ unsere Kinder litt/en darunter, dass es/sie während der Krise ihre Freunde nicht treffen konnte/n.            |               | ja      | nein |
| ..... ihre Großeltern nicht besuchen konnte/n.                                                                            |               | ja      | nein |
| ..... nicht in den Kindergarten/ in die Schule gehen konnte/n.                                                            |               | ja      | nein |
| ..... nicht auf dem Spielplatz gehen konnte/n.                                                                            |               | ja      | nein |
| ..... nicht mehr ihren Hobbies nachgehen konnte/n (z.B. Sport, Musik).                                                    |               | ja      | nein |
| Ich bin alleinerziehend.                                                                                                  |               | ja      | nein |
| Während der Krise habe ich alleine zu Hause gearbeitet (Homeoffice) und gleichzeitig mein Kind/ meine Kinder betreut.     |               | ja      | nein |
| ..... haben beide Elternteile zu Hause (Homeoffice) gearbeitet und unser Kind/unsere Kinder betreut.                      |               | ja      | nein |
| Durch die Krise hatten/haben wir zusätzlich finanzielle Sorgen, z.B. durch Kurzarbeit.                                    |               | ja      | nein |
| Bitte nennen Sie uns die Postleitzahl Ihres Wohnortes.                                                                    |               | 30_____ |      |
